RESEARCH ARTICLE

# Study on Equity and Efficiency of Health Resources and Services Based on Key Indicators in China

Xinyu Zhang<sup>1</sup>, Lin Zhao<sup>1</sup>, Zhuang Cui<sup>2</sup>, Yaogang Wang<sup>1\*</sup>

**1** Department of Health Service Management, School of Public Health, Tianjin Medical University, Tianjin, China, **2** Department of Epidemiology and Health Statistics, School of Public Health, Tianjin Medical University, Tianjin, China

\* [wangyg@tmu.edu.cn](mailto:wangyg@tmu.edu.cn)

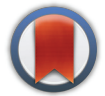

CrossMark  
click for updates

## Abstract

### Background

This study aims to evaluate the dialectical relationship between equity and efficiency of health resource allocation and health service utilization in China.

### Methods

We analyzed the inequity of health resource allocation and health service utilization based on concentration index (CI) and Gini coefficient. Data envelopment analysis (DEA) was used to evaluate the inefficiency of resource allocation and service utilization. Factor Analysis (FA) was used to determine input/output indicators.

### Results

The CI of Health Institutions, Beds in Health Institutions, Health Professionals and Outpatient Visits were -0.116, -0.012, 0.038, and 0.111, respectively. Gini coefficient for the 31 provinces varied between 0.05 and 0.43; out of these 23 (742%) were observed to be technically efficient constituting the “best practice frontier”. The other 8 (25.8%) provinces were technically inefficient.

### Conclusions

Health professionals and outpatient services are focused on higher income levels, while the Health Institutions and Beds in Health Institutions were concentrated on lower income levels. In China, a few provinces attained a basic balance in both equity and efficiency in terms of current health resource and service utilization, thus serving as a reference standard for other provinces.

## OPEN ACCESS

**Citation:** Zhang X, Zhao L, Cui Z, Wang Y (2015) Study on Equity and Efficiency of Health Resources and Services Based on Key Indicators in China. PLoS ONE 10(12): e0144809. doi:10.1371/journal.pone.0144809

**Editor:** Abdisalan Mohamed Noor, Kenya Medical Research Institute - Wellcome Trust Research Programme, KENYA

**Received:** December 18, 2014

**Accepted:** November 24, 2015

**Published:** December 17, 2015

**Copyright:** © 2015 Zhang et al. This is an open access article distributed under the terms of the [Creative Commons Attribution License](https://creativecommons.org/licenses/by/4.0/), which permits unrestricted use, distribution, and reproduction in any medium, provided the original author and source are credited.

**Data Availability Statement:** All relevant data are within the paper and its Supporting Information files.

**Funding:** This study was supported by the National Natural Science Foundation of China [no. 71273187] and National Natural Science Foundation of China [no. 71473175]

**Competing Interests:** The authors have declared that no competing interests exist.

## Introduction

Equity and efficiency in health resource-allocation and health service utilization is being increasingly advocated [1, 2]. The concept of equity in health care has been widely debated over the years. Although equity may be defined in several ways, it implies a fair distribution of an entity such as health services among different individuals and groups in the society [3]. Equity in health resources is divided along horizontal and vertical dimensions [4]. The World Health Organization advocates the concepts of horizontal equity, healthcare to those in primary health need, and vertical equity, addressing those with the greatest need [5]. Health efficiency is a measure of output (such as hospital business income, outpatient visits, and bed utilization rate) a province can achieve using a certain level of input (such as health institution, health professionals, beds in health institutions, and total health expenditure). Efficiency studies help to delineate areas where costs could be reduced and output increased for a more efficient utilization of health services [6]. It is a means to provide access to basic health services equitably and effectively, and ultimately leading to improved health status.

China has been undergoing the most rapid industrialization and urbanization in recent decades. Due to the diversity in Chinese geography, there is an imbalance in economic development between the eastern, central, and western regions, causing inequity and inefficiency in health resources allocation. The western and central regions lack high quality health resources rendering it difficult to access health care. The high cost of medical services is significant barrier that prevents access to health services (Fig 1). The eastern, central, and western regions of China are divided according to regional economy, population, environment, and other factors. In contrast to the prosperous eastern region, and the industrial and agricultural central region, the western region, situated inland is environmentally and economically underdeveloped. The humid climate in the eastern and central plains is more suited to agriculture and animal husbandry, while the rugged terrain in the west, with its mountains and plateaus, contributes to inclement weather. In terms of population, the eastern region covers a small but densely populated geographical area. The central region is mainly rural, while the western region is geographically vast but sparsely populated (S1 Table).

Equity and efficiency in health resource allocation and service utilization are important objectives for the healthcare system that are increasingly attracting attention in China [7]. The Chinese government has revised its approach to improve equity and efficiency of health resource and services [8–11]. In this paper, we used concentration index (CI), Gini coefficient and data envelopment analysis (DEA) to evaluate the equity and efficiency in health resource allocation and health service utilization in the 31 provinces of China.

## Methods

### Ethics Statement

All participants provided written informed consent to participate in this study as well as for publishing the case details. The study was approved by the institutional review board and the ethics committees at the Tianjin Medical University, Tianjin, People's Republic of China.

### Methods of equity evaluation

The CI and the Gini coefficient have been identified as superior tools for measuring inequity in health resource allocation [12]. Concentration index allows for assessment of the distribution of health resources by economic status of health care beneficiaries, and reflects the relationship between health allocation and family income. The Gini coefficient examines the distribution of

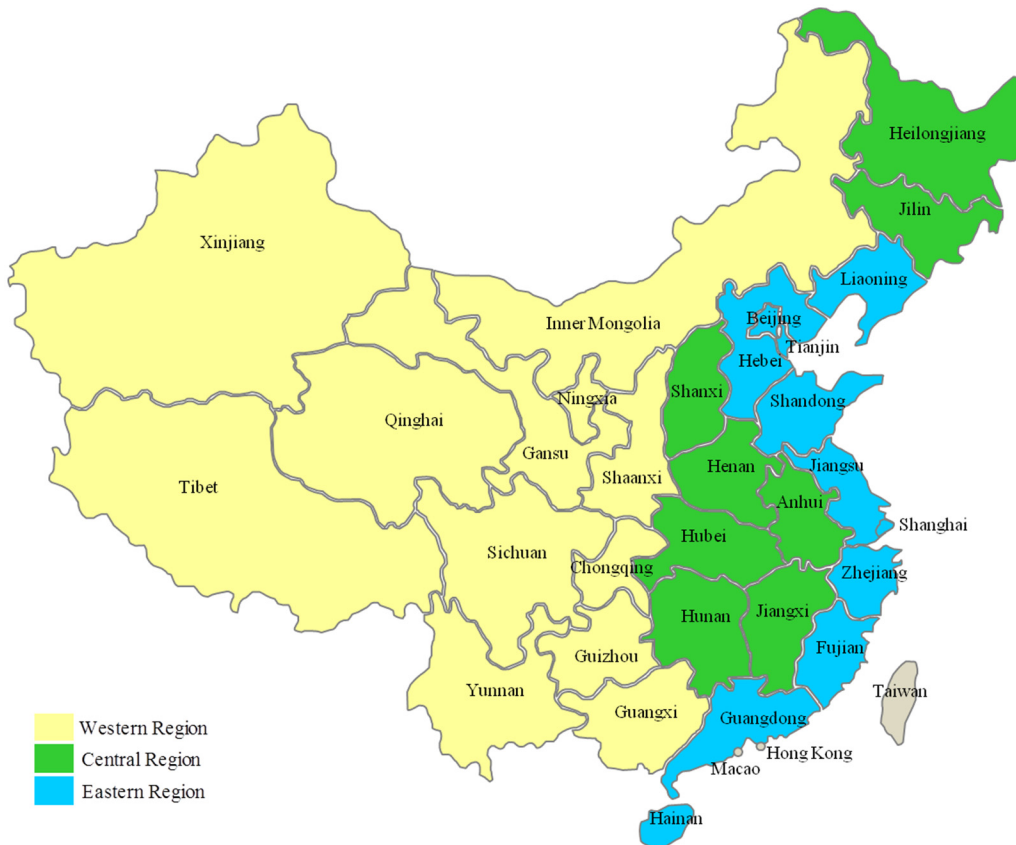

**Fig 1. The eastern, central and western regions of China.**

doi:10.1371/journal.pone.0144809.g001

health resources in the total population, and reflects the relationship between allocation and population density.

In this study, CI is used as a measure of inequity in health resource allocation by health indicators. The Gini coefficient is used as a measure of the inequity in health resource allocation between provinces.

**Concentration index.** A concentration curve was drawn with the cumulative proportion of a health outcome on the y-axis, against the cumulative population ranked by economic status of the beneficiaries on the x-axis [13]. If everyone in a given population, irrespective of economic status, had exactly the same health outcome, the concentration curve would be represented by a 45° line running from the bottom left-hand corner to the top right-hand corner of the plot. The CI is defined as twice the area between the concentration curve and the line of equality [14]. The value of CI ranges from -1 to 1, with 0 indicating perfect equality. The index is negative if it lies above the line of equality, which indicates a disproportionate concentration of the variable among individuals with lower income levels. It is positive if it lies below the line of equality, indicating that the variable was disproportionately concentrated among individuals with higher income levels. The greater the distance between the concentration curve and the line of equality, the more concentrated are the health variables among individuals with lower or higher income levels [15].

The concentration index is represented by the following equation [16]:

$$C = \frac{2}{\mu} \text{cov}(h, r)$$

where  $h$  is the health variable,  $r$  is the fractional rank in terms of household economic status, and  $\mu$  is the mean of the health variables.

**Gini coefficient.** In this study, the Gini coefficient was adopted as a measure of the inequality in health resource allocation between provinces. The Gini coefficient is calculated as the ratio of the area between the Lorenz curve and the diagonal line, to the whole area below the 45° line. The following formula was used to calculate the Gini coefficient:

$$G = |1 + \sum F_n P_n - 2 \sum (\sum P_n)' F_n|$$

where  $G$  is the Gini coefficient,  $F_n$  is the proportion of the shifted integral factor score to the sum of all regional scores,  $P_n$  is the proportion of the regional population in the total population, and  $(\sum P_n)'$  refers to the cumulative proportion in the total population.

## Efficiency evaluation

**Data envelopment analysis (DEA).** Data envelopment analysis (DEA), a nonparametric mathematical programming methodology first developed by Charnes *et al* [17] uses the frontier approach to measure the relative efficiency or performance of decision-making units (DMUs), based on a fractional programming problem that has been converted into a linear programming problem. The efficient DMUs that represent the “best practice frontier” are assigned an efficiency score of 1. The inefficient DMUs are assigned a score between 1 and 0 [18]. Charnes *et al* developed the first model as the constant return to scale (CRS) model, which was used to measure each DMU's Overall Efficiency (OE), whether the “technology and scale” was effective at the same time. R.D. Banker, A. Charnes, and W.W. Cooper developed the variable return to scale model (VRS model) in 1984, which is used to measure the technical efficiency of DMU with altered size of return [19]. VRS model divided the OE of the CRS model into technical efficiency (TE) and scale efficiency (SE). The VRS model assumes that each DMU scale return may increase, decrease, or remain unchanged.

Overall efficiency was measured using the CRS model, which refers to similar circumstances and actual output as the ratio of the maximum output. TE and SE were measured using the VRS model. Technical efficiency is defined as the ratio of the minimum (optimal) amount of input to the actual input levels of a DMU for a given level of output, keeping the input proportion constant [20]. Scale efficiency refers to the constant evaluation of the scale return, the multiple output increase as equivalent to increase in multiple inputs. Overall efficiency is calculated using the following formula:

$$OE = \text{Technical Efficiency} * \text{Scale Efficiency}$$

The TE and SE scores were computed using the DEA Program, version 2.1 (DEAP 2.1), developed by Tim Coelli. DEA model was tested for robustness.

**Data and variables.** Our study was focused on health resource allocation and health service utilization in specific areas rather than in an individual hospital or institution. Data were obtained from the national public databases: the China Statistical Yearbook and the Annual National Health Report. Data on the socioeconomic status of provinces was sourced from the China Statistical Yearbook. The health resource and health survival data were sourced from the Annual National Health Report for 2012 issued by the Chinese National Health and Family

Planning Commission. The study was partly based on a national representative survey dataset. The study data were derived from the same time span and statistical unit as the database. In this research, we considered every province as an analytical unit. The health resources and services in the 31 provinces, autonomies, and municipalities of China were studied. The province represents the unit of analysis. Population, socioeconomic and health resources in each province were computed at the micro level (City, Town, County or District) previously. The use of geographic units as DMUs in the DEA method is based on a previous study [21]. A total of 31 DMUs were used to reflect the regional administration according to Chinese geography.

Similar to the other statistical methods, stability in the form of degrees of freedom is also an issue in DEA. In this method, the degrees of freedom increased with the number of DMUs, and decreased with the number of inputs and outputs. A general rule of thumb is [22]:

$$n \geq \max\{m \times s, 3(m + s)\},$$

where  $n$  represents the number of DMUs,  $m$  denotes the number of inputs, and  $s$  refers to the number of outputs. Therefore, the minimum number of DMUs is either the product of the number of inputs and the number of outputs, or three times that of the sum of the number of inputs and outputs, whichever is bigger [23].

The indicators in the DEA method offer two basic advantages in the efficiency analysis [24]:

- First, it is a simple methodology that converts indicators into user-friendly efficiency parameters;
- Secondly, fewer variables are needed to calculate the indicators than to estimate the DEA Model. Therefore, even scarce data may prove advantageous in the estimation of the efficiency of the indicators.

This study includes 4 inputs and 3 outputs, with 31 DMUs to meet the required degrees of freedom. Based on the above principle and the results of principal component analysis, we selected the Health Institution, Health Professionals, Beds in Health Institution, Total Health Expenditure as input indicators; and Hospital Business Income, Outpatient Visits, and Bed Utilization Rate as output indicators.

## Methods to determine input/output indicators

**Delphi method.** For the Delphi method, we selected experts from public health, health management, hospital management and health department with a 100% response rate. The majority of the participants (20) were doctors (55%), including 25% women. The average age was 50 years. All the experts were briefed on the aim of the study and the Delphi procedure. The results of the standardized questionnaire were analyzed using descriptive statistics, such as, consensus, mean values, standard deviation and coefficient of variation, and returned to the experts. The descriptive data analysis for the second and third round was performed using SPSS 13.0 for Windows software (IBM). The study was conducted from May to July 2013.

A comprehensive literature review was carried out to ensure that all potential health resource indicators were considered. A draft list of 224 indicators was prepared. The edited list of 224 indicators was sent to each of the 20 experts in the Delphi panel for additional suggestions and comments. The revised draft list of 220 indicators (third-stage) included 4 first-stage indices and 10 second-stage indices. A final list of 170 indicators (third-stage) of health resources was established.

Due to the complexity of data analysis involving inequity in health resource allocation, it was difficult to include all the indicators from the factor analysis (FA) in the assessment. A new round of Delphi procedure was used to select candidate variables for FA. Based on the

calculation of a comprehensive score of indicators and its representativeness, the Delphi panel recommended division of 18 indicators into input and output for FA from 170 indicators. The 9 input candidate variables (Health Institution, Beds in Health Institution, Health Professionals, Total Health Expenditure, Number of Health Professionals per 1000 Population, Number of Beds in Health Institution per 1000 Population, Average Medical Expense per Outpatient, and Average Medical Expense per Inpatient) were derived from 4 second-stage indices including “health institution resources”, “health beds”, “health professionals”, and “health funds”. The 9 output candidate variables (Outpatient Visits, Bed Utilization Rate, Hospital Business Income, Inpatients (Leave the hospital), Inpatients (Admitted to hospital), Stay Days, Average Stay Days in Hospitals, Daily Visits Per Doctor, Daily Inpatients Per Doctor) were derived from 2 second-stage indices including “population health efficiency”, “health service supply efficiency”.

**Factor analysis (FA).** Factor Analysis (FA) and Principal Component Analysis (PCA) are two broad classes of procedures that are commonly used to reduce a set of observed variables to a set of new variables. Factor analysis is a statistical tool used to account for the observed correlations among several variables, particularly when “causation is complex and multivariate, and the basic concepts have been elusive” [25]. Principal Component Analysis is computed without regard to any underlying structure caused by latent variables. Components are calculated using all of the variance of the manifest variables, and all of that variance appears in the solutions [26].

In this paper, FA was mainly conducted to determine the key indicators for input/output from 18 candidate variables (9 input indicators and 9 output indicators). Health resource and service indicator data were prepared for FA by including variables that were believed to be related to each other, and that allowed sufficient observation to provide reliable estimation of correlations between the variables. PCA for factor extraction was chosen. The factors with the highest eigenvalues were considered as the most significant. Eigenvalues of  $\geq 1.0$  were considered significant [27].

Tables 1 and 2 show the corresponding component score and variance. With respect to the data on health resources and health services in 31 provinces in China, 4 input factors (Health Institution, Health Professionals, Beds in Health Institution, and Total Health Expenditure), and 3 output factors (Hospital Business Income, Outpatient Visits, and Bed Utilization Rate) suggest more than 96.5% of the total variance, respectively. Hence, 4 factors and 3 factors were considerably representative of health resource allocation and service utilization, and were used to evaluate the equity and efficiency of the process. Each indicator with a strong correlation coefficient value ( $> 80\%$ ) was considered as a significant parameter contributing to the indicators of health resource allocation and service utilization across the 31 provinces (Table 3).

## Results

### Equity evaluation based on concentration index and Gini coefficient

**Concentration Index.** The CI results were based on every province as an analytical unit, accounting for the 31 units (provinces) in the population. A concentration curve was drawn with the cumulative proportion of health inputs on the y-axis, and cumulative proportion of the population (31 units) ranked by economic status (beginning with the poorest and ending with the richest) on the x-axis. A general CI of the country reflected equity distribution of health inputs in the country.

Table 4 shows the results of our inequity analysis. The CIs reflecting inequity, were -0.116 (Health Institution), -0.012 (Beds in Health Institution), 0.038 (Health Professionals), and 0.111 (Outpatient Visits), which were statistically significant at 5%. These results indicate that



Table 1. Total Variance Explained.

| Health resources (Input) |            |               |            | Health services (Output) |            |               |            |
|--------------------------|------------|---------------|------------|--------------------------|------------|---------------|------------|
| Component                | Eigenvalue | % of Variance | Cumulative | Component                | Eigenvalue | % of Variance | Cumulative |
| 1                        | 8.112      | 90.135        | 90.135     | 1                        | 8.086      | 89.841        | 89.841     |
| 2                        | 0.428      | 4.761         | 94.895     | 2                        | 0.402      | 3.426         | 93.267     |
| 3                        | 0.253      | 2.813         | 97.708     | 3                        | 0.391      | 3.138         | 96.405     |
| 4                        | 0.117      | 0.669         | 98.523     | 4                        | 0.136      | 1.69          | 98.095     |
| 5                        | 0.105      | 0.633         | 99.01      | 5                        | 0.102      | 1.002         | 99.097     |
| 6                        | 0.046      | 0.508         | 99.518     | 6                        | 0.059      | 0.658         | 99.755     |
| 7                        | 0.034      | 0.375         | 99.893     | 7                        | 0.022      | 0.245         | 100        |
| 8                        | 0.006      | 0.07          | 99.963     | 8                        | 0          | 0             | 100        |
| 9                        | 0.003      | 0.037         | 100        | 9                        | 0          | 0             | 100        |

doi:10.1371/journal.pone.0144809.t001

the input “Health Professionals” was allocated higher income levels. Compared with the lower income levels, the higher income levels were more likely to utilize outpatient services in China. The negative value of the CI shows that Health Institution, Beds in Health Institution, and inpatient services were utilized by the lower-income population. These results indicate that the socioeconomic inequities observed in health resources allocation and health services utilization may lead to significant public health issues [28].

**Gini coefficient.** The Gini coefficient is frequently used as an index of unequal health care resource distribution in the population. For accuracy, we collected data from subordinate units (district and counties) of each province to determine the population size and resource density (S2 Table). For each province, three Lorenz curves were drawn (Health Institution, Beds in Health Institution, Health Professionals) with the cumulative proportion of a health input on the y-axis, and cumulative proportion of the population (districts and counties in the province), ranked by economic status (beginning with the poorest and ending with the richest) on the x-axis. Three Gini coefficients were obtained for each province, analyzing equitable distribution of health inputs in the province. Finally, the 31 provinces were compared based on the results of the three health inputs.

Fig 2 illustrates the health resource allocation in the population of 31 provinces in China. The Gini coefficient for Health Institution in Guizhou (0.41) was more than four times higher than that of Jilin (0.11), indicating a substantial inequity in Health Institution allocation. For Beds in Health Institution, inequity of health allocation was found not only in developing areas but also in the largest cities. Provinces in the western region, including Qinghai, Tibet,

Table 2. The factor loadings value of health resources and health services.

| Health resources (Input)                                 | Loadings value | Health services (Output)         | Loadings value |
|----------------------------------------------------------|----------------|----------------------------------|----------------|
| Health Institution                                       | 0.830          | Outpatient Visits                | 0.888          |
| Beds in Health Institution                               | 0.886          | Bed Utilization Rate             | 0.864          |
| Health Professionals                                     | 0.898          | Hospital Business Income         | 0.870          |
| Total Health Expenditure                                 | 0.923          | Inpatients(Leave the hospital)   | 0.190          |
| Number of Health Professionals per 1000 Population       | 0.097          | Inpatients(Admitted to hospital) | 0.190          |
| Number of Beds in Health Institution per 1000 Population | 0.084          | Stay day                         | 0.164          |
| Average Medical Expense per Outpatient                   | 0.125          | Average Stay Days in Hospitals   | -0.070         |
| Average Medical Expense per Inpatient                    | 0.114          | Daily Visits Per Doctor          | 0.083          |
| Total Assets                                             | 0.221          | Daily Inpatients Per Doctor      | 0.120          |

doi:10.1371/journal.pone.0144809.t002

**Table 3. Health resources and health services of 31 provinces in China<sup>a</sup>.**

| Provinces      | Health resources (Input)        |                            |                                   |                                                              | Health services (Output)  |                          |                                                 |
|----------------|---------------------------------|----------------------------|-----------------------------------|--------------------------------------------------------------|---------------------------|--------------------------|-------------------------------------------------|
|                | Health Institution <sup>b</sup> | Beds in Health Institution | Health Professionals <sup>c</sup> | Total Health Expenditure (USD*10 <sup>4</sup> ) <sup>d</sup> | Outpatient visits (Times) | Bed Utilization Rate (%) | Hospital Business Income (USD*10 <sup>4</sup> ) |
| Beijing        | 9,495                           | 94,735                     | 181,936                           | 1,522,225.52                                                 | 161,728,305               | 84.4                     | 1,280,145.51                                    |
| Tianjin        | 4,428                           | 49,423                     | 73,318                            | 530,117.04                                                   | 86,906,788                | 90                       | 473,560.59                                      |
| Hebei          | 80,185                          | 266,479                    | 301,672                           | 959,959.60                                                   | 335,411,546               | 85.6                     | 894,108.07                                      |
| Shanxi         | 40,339                          | 157,132                    | 191,416                           | 509,470.54                                                   | 109,464,383               | 75.4                     | 397,134.61                                      |
| Inner Mongolia | 22,908                          | 100,633                    | 131,603                           | 416,397.69                                                   | 87,800,819                | 81.1                     | 327,529.70                                      |
| Liaoning       | 35,229                          | 215,815                    | 235,623                           | 878,117.60                                                   | 154,400,472               | 85.2                     | 780,036.18                                      |
| Jilin          | 19,785                          | 121,240                    | 139,010                           | 481,285.26                                                   | 89,831,148                | 75                       | 394,005.78                                      |
| Helongjiang    | 21,749                          | 165,255                    | 195,029                           | 637,137.96                                                   | 105,729,867               | 79.6                     | 532,924.39                                      |
| Shanghai       | 4,740                           | 107,130                    | 140,740                           | 1,349,487.22                                                 | 210,629,305               | 96.6                     | 1,186,770.39                                    |
| Jiangsu        | 31,680                          | 296,390                    | 350,544                           | 1,941,334.82                                                 | 406,837,180               | 92.9                     | 1,763,596.28                                    |
| Zhejiang       | 30,515                          | 194,759                    | 306,922                           | 1,794,354.69                                                 | 408,862,250               | 94.6                     | 1,591,535.85                                    |
| Anhui          | 22,884                          | 204,210                    | 217,591                           | 759,047.07                                                   | 204,303,899               | 87.2                     | 679,640.03                                      |
| Fujian         | 27,147                          | 124,232                    | 158,791                           | 637,599.53                                                   | 175,181,563               | 90.6                     | 584,375.25                                      |
| Jiangxi        | 39,154                          | 135,570                    | 165,938                           | 542,618.44                                                   | 178,937,053               | 94.1                     | 465,975.21                                      |
| Shandong       | 68,275                          | 416,148                    | 481,738                           | 1,697,765.72                                                 | 517,942,116               | 85                       | 1,541,900.53                                    |
| Henan          | 76,128                          | 349,612                    | 396,300                           | 1,127,098.88                                                 | 464,965,269               | 88.1                     | 1,043,063.03                                    |
| Hubei          | 35,625                          | 223,980                    | 268,122                           | 1,005,356.44                                                 | 267,984,254               | 98.7                     | 899,466.62                                      |
| Hunan          | 59,634                          | 257,687                    | 282,511                           | 960,951.74                                                   | 216,852,772               | 94.8                     | 883,543.07                                      |
| Guangdong      | 45,930                          | 325,038                    | 485,585                           | 2,473,097.52                                                 | 652,532,340               | 86.6                     | 2,252,891.98                                    |
| Guangxi        | 34,026                          | 152,039                    | 204,011                           | 640,694.42                                                   | 205,285,704               | 93.3                     | 569,657.57                                      |
| Hainan         | 4,816                           | 28,465                     | 43,295                            | 155,209.43                                                   | 37,025,321                | 86.5                     | 125,818.43                                      |
| Chongqing      | 17,650                          | 115,627                    | 120,151                           | 502,228.42                                                   | 125,215,307               | 91.2                     | 432,058.03                                      |
| Sichuan        | 75,815                          | 334,663                    | 352,259                           | 1,220,469.36                                                 | 389,125,909               | 96.7                     | 1,096,293.24                                    |
| Guizhou        | 25,943                          | 117,534                    | 113,801                           | 351,987.69                                                   | 108,106,958               | 87.1                     | 311,908.58                                      |
| Yunnan         | 23,248                          | 173,434                    | 150,982                           | 605,802.39                                                   | 180,248,724               | 88.7                     | 520,501.75                                      |
| Tibet          | 6,602                           | 9,592                      | 10,782                            | 38,075.46                                                    | 10,502,419                | 69.6                     | 16,768.55                                       |
| Shaanxi        | 36,396                          | 153,847                    | 197,173                           | 566,177.80                                                   | 146,659,544               | 84                       | 473,571.00                                      |
| Gansu          | 26,632                          | 94,907                     | 105,908                           | 303,626.45                                                   | 107,000,739               | 82.1                     | 221,937.98                                      |
| Qinghai        | 5,887                           | 23,117                     | 27,520                            | 91,429.59                                                    | 20,826,836                | 77.3                     | 67,787.62                                       |
| Ningxia        | 4,132                           | 25,805                     | 31,983                            | 121,056.09                                                   | 28,123,628                | 91.1                     | 92,217.28                                       |
| Xinjiang       | 17,412                          | 125,391                    | 130,604                           | 503,128.02                                                   | 76,803,860                | 92.5                     | 396,144.72                                      |

<sup>a</sup> Data from China health statistics annual 2012.

<sup>b</sup> Health Institution includes hospital, grassroots health care institution, specialized public health institution, other institution. Grassroots health care institution includes community health center & station, sub-district health center, village clinic, outpatient department, clinic. Specialized public health institution include CDC, specialized disease prevention & treatment Institution, health education center, MCH center, emergency center, center for blood collection & supply, center for health supervision, center for family planning service.

<sup>c</sup> Health Professionals include practicing physicians, practicing physician assistant, registered nurses, pharmacists, inspection technician, image technician, health supervisors and trainee doctors, etc.

<sup>d</sup> 1 USD = 6.2452CNY (13/5/2014).

doi:10.1371/journal.pone.0144809.t003

and Xinjiang, showed high Gini coefficients ranging between 0.17 and 0.27. However, three of the four municipalities directly under the central government of China, namely, Tianjin, Shanghai, and Beijing, had the highest Gini coefficients (0.40, 0.39, and 0.33, respectively). The Gini coefficient for Health Professionals indicates inequity of allocation between



**Table 4. Concentration index for health resources allocation and health services utilization.**

|    | Health resources allocation |                            |                      | Health services utilization |
|----|-----------------------------|----------------------------|----------------------|-----------------------------|
|    | Health Institution          | Beds in Health Institution | Health Professionals | Outpatient Visits           |
| CI | -0.116                      | -0.012                     | 0.038                | 0.111                       |

doi:10.1371/journal.pone.0144809.t004

provinces, with the Gini coefficient for Shanghai (0.43) more than eight times higher than that of Hainan (0.05). The detailed health resources in each province representing Gini coefficient are listed in [S2 Table](#).

### Efficiency evaluation by data envelopment analysis (DEA)

**Overall efficiency.** Overall Efficiency was measured using the CRS model, which indicates that under similar circumstances, the actual output was similar to the ratio of maximum output. According to the VRS model, the OE is a product of TE and SE.

As shown in [Fig 2](#), the average overall efficiency score of the 31 provinces was 0.973 in 2011. Based on the scores, 18 provinces (58.1%) were efficient in terms of health resource allocation, whereas the remaining 13 provinces (41.9%) were inefficient. Among the inefficient provinces, Xinjiang had the lowest score of 0.868, which indicates that its efficiency was 86.8% of that of the efficient provinces.

**Pure technical efficiency and scale efficiency.** [Fig 2](#) shows the TE and SE scores and the returns to scale characteristics of the individual provinces. The mean scores of pure TE and SE in the 31 provinces were 0.981 and 0.992, respectively. Of the 31 provinces included in the study, 23 (74.2%) were technically efficient. The other 8 provinces were technically inefficient, with an average TE score of 0.927. This finding suggests that the 8 inefficient provinces potentially reduced their current input while maintaining their output levels unchanged. In other words, the 8 technically inefficient provinces produced more output at their current levels of input. Nineteen (61.3%) provinces had an SE score of 100% (Shandong province scored 99.9%, or approximately 100%), which implies that they had the most productive scale size for that particular input-output mix. The remaining 12 provinces were found to be scale-inefficient, with a mean SE score of 0.982. Anhui, Jiangxi and Hubei provinces had a decreasing scale ratio, suggesting that input size can be reduced without affecting their current output levels. On the other hand, Shanxi, Inn Mongolia, Jilin, Guangxi, Yunnan, Shaanxi, Gansu, Qinghai and Xinjiang provinces showed increasing scale benefit, suggesting that their scales of health resources allocation were inefficient, with a scope for strengthening their inputs.

**Input-output analysis.** An input-output analysis of 31 provinces with overall inefficiency was also performed to examine the redundant inputs and the expected outputs by measuring the distance between these provinces and their efficient peers [29]. Of the 12 scale-inefficient provinces, 9 (75.0%) had IRS and the remaining 3 (25.0%) had DRS. These findings indicate that 75.0% of the scale-inefficient provinces had operations that were too small and needed an expansion of their scale of operation. However, 25.0% of the inefficient provinces in China needed to scale down their operations to achieve CRS.

Compared with the efficient provinces ([Fig 2](#)), the inefficient provinces should either reduce or increase their inputs to enhance their efficiency ([Table 5](#)). The inefficient provinces need to reduce the average number of health staff by 38.4%, and the number of beds by 17.9%, to maintain constant levels of the current output. Alternatively, the inefficient provinces could increase the average number of outpatient visits by 9.9% and the bed utilization rate by 2.1%, at the current input levels.

| Provinces      | Health Institution | Beds in Health Institution | Health Professionals | Overall efficiency | Technical efficiency | Scale efficiency | Type of scale inefficiency |
|----------------|--------------------|----------------------------|----------------------|--------------------|----------------------|------------------|----------------------------|
| Beijing        | 0.39               | 0.33                       | 0.35                 | 1                  | 1                    | 1                | -                          |
| Tianjin        | 0.23               | 0.4                        | 0.41                 | 1                  | 1                    | 1                | -                          |
| Hebei          | 0.21               | 0.08                       | 0.09                 | 1                  | 1                    | 1                | -                          |
| Shanxi         | 0.17               | 0.12                       | 0.15                 | 0.89               | 0.89                 | 1                | IRS*                       |
| Inner Mongolia | 0.24               | 0.12                       | 0.1                  | 0.88               | 0.89                 | 1                | IRS                        |
| Liaoning       | 0.15               | 0.12                       | 0.12                 | 1                  | 1                    | 1                | -                          |
| Jilin          | 0.11               | 0.14                       | 0.1                  | 0.89               | 0.89                 | 1                | IRS                        |
| Heilongjiang   | 0.28               | 0.11                       | 0.12                 | 1                  | 1                    | 1                | -                          |
| Shanghai       | 0.3                | 0.39                       | 0.43                 | 1                  | 1                    | 1                | -                          |
| Jiangsu        | 0.13               | 0.07                       | 0.35                 | 1                  | 1                    | 1                | -                          |
| Zhejiang       | 0.16               | 0.09                       | 0.09                 | 1                  | 1                    | 1                | -                          |
| Anhui          | 0.16               | 0.17                       | 0.16                 | 0.98               | 0.99                 | 0.99             | DRS†                       |
| Fujian         | 0.2                | 0.12                       | 0.13                 | 1                  | 1                    | 1                | -                          |
| Jiangxi        | 0.15               | 0.1                        | 0.12                 | 0.97               | 0.98                 | 1                | DRS                        |
| Shandong       | 0.12               | 0.11                       | 0.08                 | 0.99               | 0.99                 | 1                | DRS                        |
| Henan          | 0.19               | 0.11                       | 0.1                  | 1                  | 1                    | 1                | -                          |
| Hubei          | 0.35               | 0.14                       | 0.12                 | 0.99               | 1                    | 0.99             | DRS                        |
| Hunan          | 0.21               | 0.13                       | 0.13                 | 1                  | 1                    | 1                | -                          |
| Guangdong      | 0.24               | 0.14                       | 0.18                 | 1                  | 1                    | 1                | -                          |
| Guangxi        | 0.3                | 0.1                        | 0.11                 | 0.99               | 1                    | 0.99             | IRS                        |
| Hainan         | 0.14               | 0.07                       | 0.05                 | 1                  | 1                    | 1                | -                          |
| Chongqing      | 0.16               | 0.18                       | 0.28                 | 1                  | 1                    | 1                | -                          |
| Sichuan        | 0.17               | 0.13                       | 0.14                 | 1                  | 1                    | 1                | -                          |
| Guizhou        | 0.41               | 0.14                       | 0.21                 | 1                  | 1                    | 1                | -                          |
| Yunnan         | 0.39               | 0.16                       | 0.19                 | 0.95               | 1                    | 0.95             | IRS                        |
| Tibet          | 0.14               | 0.19                       | 0.19                 | 1                  | 1                    | 1                | -                          |
| Shaanxi        | 0.16               | 0.1                        | 0.13                 | 0.89               | 0.91                 | 0.98             | IRS                        |
| Gansu          | 0.23               | 0.17                       | 0.21                 | 0.9                | 1                    | 0.9              | IRS                        |
| Qinghai        | 0.13               | 0.27                       | 0.29                 | 0.99               | 1                    | 0.99             | IRS                        |
| Ningxia        | 0.18               | 0.13                       | 0.2                  | 1                  | 1                    | 1                | -                          |
| Xinjiang       | 0.22               | 0.17                       | 0.17                 | 0.87               | 0.88                 | 0.99             | IRS                        |

Lower than mean  
 Indistinguishable from mean  
 Higher than mean

**Fig 2. Gini coefficient, overall, technical and scale efficiency scores and returns to scale characteristics for health resources allocation and health services utilization of each province.** Numbers in cells show the coefficient of each province for each index. \* IRS: increasing return to scale. † DRS: decreasing return to scale.

doi:10.1371/journal.pone.0144809.g002

Table 5. The excess of input and inadequate of output of inefficient provinces.

| DMU          | Input              |                  |                      |                          | Output                    |                          |                          |
|--------------|--------------------|------------------|----------------------|--------------------------|---------------------------|--------------------------|--------------------------|
|              | Health Institution | Beds in Hospital | Health Professionals | Total Health Expenditure | Outpatient Visits (Times) | Bed Utilization Rate (%) | Hospital Business Income |
| Shanxi       | 6908               | 17414            | 367774               | 0                        | 29401040                  | 3.059                    | 0                        |
| Inn Mongolia | 0                  | 9425             | 11856                | 0                        | 8785033                   | 2.878                    | 0                        |
| Jilin        | 0                  | 22823            | 28671                | 0                        | 13452901                  | 1.867                    | 0                        |
| Anhui        | 0                  | 29922            | 58728                | 0                        | 9349013                   | 0.948                    | 0                        |
| Jiangxi      | 0                  | 11747            | 30128                | 0                        | 11199022                  | 1.586                    | 0                        |
| Shandong     | 0                  | 49158            | 100980               | 0                        | 62345239                  | 5.929                    | 0                        |
| Hubei        | 0                  | 19898            | 401981               | 0                        | 11783229                  | 0                        | 0                        |
| Guangxi      | 0                  | 15787            | 12675                | 0                        | 8829042                   | 2.334                    | 0                        |
| Yunnan       | 0                  | 17929            | 10779                | 0                        | 9786390                   | 0.894                    | 0                        |
| Shaanxi      | 0                  | 25806            | 44207                | 0                        | 11134902                  | 0.981                    | 0                        |
| Gansu        | 4479               | 6223             | 2355                 | 0                        | 3922012                   | 0                        | 0                        |
| Qinghai      | 0                  | 4473             | 3154                 | 0                        | 4528900                   | 1.482                    | 0                        |

doi:10.1371/journal.pone.0144809.t005

TE and SE are relative efficiency indices, which express the efficiency of health resources utilization in a province compared to that of the 30 other provinces. A 1% difference in health resource utilization efficiency suggests a huge resource surplus or shortage.

The results for Inner Mongolia (OE = 0.88, TE = 0.89, SE = 1), for example, indicate that the province should reduce its health staff to 11,856, and its beds to 9,425, to attain an OE at the present input level. In other words, to maintain the efficiency of excessive resource allocation, the number of outpatient visits needs to be increased to 8,785,033, and the bed utilization rate increased by 2.9%. The result of Inner Mongolia may be influenced by the scale of demographic and administrative area, but this estimation still provides a guideline for health resource allocation and service utilization.

### Discussion

The CI method enabled analysis of income-related inequity of health resource allocation and health service utilization in China [30, 31]. Our findings suggest inequitable resource allocation and service utilization among different population groups. Further, Health Professionals and Outpatient Visits are concentrated at higher income levels, while the Health Institutions and Beds in Health Institution are concentrated at the lower income levels. The findings suggested that the Outpatient Visits and Bed Utilization Rate were affected by inefficiency. For the inefficient provinces, there is a need to transfer their excessive input resources to grassroots health care institutions to meet the requirement for primary health services.

A few provinces showed good performance in terms of equity and efficiency. For example, Hainan, Shandong, and Zhejiang provinces showed efficient output of health services based on the input resources, thus reflecting an equitable allocation. The biggest eastern cities including Shanghai, Beijing, and Tianjin, had generally efficient but inequitable health resource allocation. In the central region, Jilin, Jiangxi, and Shannxi appeared to have had equitable resource allocation, but the efficiency of service outputs was inadequate. In the western region, including Yunnan, Qinghai, and Gansu, both resource allocation and service utilization were inequitable and inefficient. The overall factors such as the quality of resources, geographic location, and efficiency of primary health care services should be considered in any decision-making.

Health professionals are often attracted by monetary incentives and opportunities for career progression. Well-developed areas provide higher salaries and greater research opportunities. The CI also showed inequities in outpatient service utilization, indicating a disproportionate share of resources utilized by higher-income individuals. Compared with the affluent groups lower-income individuals are more likely to suffer from diseases that require more inpatient visits.

Affluent individuals tend to be afflicted with chronic diseases that require frequent outpatient visits on a long-term basis. In well-developed regions, such as eastern China, people have general health insurance coverage, which normally results in a high proportion of outpatient reimbursement. In economically underdeveloped areas, such as western China, accessibility to health resources is low. Residents suffering from common or chronic diseases fail to utilize outpatient services, resulting in inequity of outpatient service utilization.

In the present study, four main types of health institutions were included, i.e., hospitals, grassroots health care institutions, specialized public health institutions, and other institutions. Grassroots health care institutions account for 96.2% of the health institutions in China, whereas hospitals account for only 2.3%. Our findings suggest that even people with lower income are able to access health institutions. A potential explanation for this finding is that health institutions need government support for resource allocation. Therefore, resource allocation is not only affected by income level but also by government funding that enables access to primary health care equally by people with low incomes. Similarly, when planning the number of beds in a health institution, policy makers need to consider the population size.

Due to geographical conditions, people in developing regions often need to travel long distances in order to access hospital services. Low income is usually a barrier that prevents frequent hospital visits until hospitalization is inevitable. Therefore, the utilization of beds and inpatient services in health institutions is predominantly seen in the lower-income groups.

The average overall efficiency score of 0.8 shows that the 31 provinces included in the study produced similar output, while saving 20% on their input. Optimizing the input/output and controlling the scale of operations could improve the efficiency of resource allocation and service utilization in all the provinces. At their current scale, inefficient provinces are primarily tasked with developing human resources and improving medical skills and staff performance. Training for public health, rural health, and urban health professionals and technical personnel to optimize their management structures in order to effectively utilize inputs and improve the quality of health care services is needed.

Class III hospitals are representative of the high-quality health resources in China. Of the total number of hospitals in China, only 6.37% are graded as Class III, 46.68% of which are in the eastern region indicating that 30% of the provinces have 50% of the high-quality health resources. About 20% high-quality health resources cater to nearly 40% high-quality health services which is suggestive of quantitative and qualitative differences in resources and services across the provinces and hospitals.

Health services provided by primary health institutions are inefficient, and unable to meet the primary health care needs. No significant differences were observed between the primary, secondary and tertiary health care services in terms of health insurance currently. Patients with common health conditions visit specialty hospitals for better treatment, resulting in inequitable resource allocation and service utilization.

Several countries face similar basic challenges, which include the positioning of value orientation of health resource allocation; the governmental functional orientation to resource allocation, and the role of market forces. The USA and Sweden vary in their value orientation of resource allocation. The United States has the biggest proportion of medical investment in the world. It also has the most advanced medical technology and the highest total health

expenditure and per capita health care cost as a percentage of total GDP. However, the population health is unsatisfactory. Life expectancy at birth in the USA was 71 years in 2012 [32].

The Swedish government allocates health resources as welfare services, with policies in place to reduce inequity in resource allocation. Sweden has a high quality of medical care, and the health status and average life expectancy of its population are among the best in the world. At the same time, the Swedish state monopoly has caused inefficiency in health resource allocation, and the "generous" health care expenditure has been exerting increasingly heavy pressure on the government finances. This approach has not only exceeded the capacity of the economy but has also increased the taxpayer's burden. The Swedish government has thus adjusted the budget in accordance to the quality and effectiveness of health services, promoting efficient use of health services by encouraging competition among health institutions. These policies provide consumers with an increased freedom of choice in selecting the services. Based on an analysis of the inputs and outputs in the United States and Sweden, we suggest that governments should work according to the local conditions to enhance equity and efficiency.

From the discussion above, we have some suggestions to ameliorate the inequity in distribution of health resources in China. According to the regional economic development level, China should adopt a different configuration mode for health resource allocation and services utilization. For the relatively backward areas, focus should be on improving the equity of allocation of health resources. In addition commitment to meet the basic medical demand from the low-income groups is required. The eastern developed areas should aim to improve the efficiency of health resources allocation and service utilization while taking cognizance of the state of the economy to ensure provision of better quality health services.

Educating residents to utilize community health service centers for primary health care would boost the net utilization of services. The compensation ratio of medical insurance should lean towards the community health service centers and institutes. Policy should encourage ailing residents to utilize community health service centers, and seriously ill residents to attend hospitals. In addition, the government also needs to strengthen the establishment of grassroots medical institutions which will help reduce the observed redundancy in input levels and overall service utilization. Developing grassroots health facilities will help expand the availability and access to health services with relatively small investments. It is particularly important for the underdeveloped areas to bring about health equity.

Institutional measures are required to shape the structure of health resources: First, integrate the existing infrastructure for battling infectious diseases and develop a preventive focus. Second, strengthen the grassroots health infrastructure and its capacity for improved service delivery. Third, strengthen the support in terms of skill development and strengthening of key disciplines.

Cultivating talent and flow service mode: At present, China's high-income area accrues a large volume of health human resources, and at the same time its low-income area residents have poor access to quality medical services and inequitable distribution of diagnosis and treatment. The flow of health human resources can be resolved in two broad ways: by shifting of human resources from areas with a disproportionate excess of health human resources to the underserved areas. Another approach would be to build capacity of rural health human resources by institutionalizing training activities in developed regions. Return of these personnel to rural areas after a period of training will help improve the quality of medical care in the economic backward areas in a sustainable manner.

Major limitations of this study include inadequate representativeness of the indicators for evaluating equity and efficiency of health resource allocation and health service utilization, which may have affected the comparison among provinces. However, these indicators have commonly been used in similar studies. Secondly, the data used may not represent the most

current statistics, which reduces the timeliness of the decision-making. Furthermore, the methods of equity and efficiency evaluation were conducted independently in two phases, which needs improvement in the general analysis.

Further studies are needed with additional indicators to achieve a comprehensive evaluation of health resource allocation and service utilization based on improved accuracy and reliability of the data. A balanced model is needed to represent both the equity and efficiency of resource allocation and utilization on a global scale.

## Supporting Information

### S1 Table. Social and Economic Conditions of China.

(DOCX)

### S2 Table. Health resources in each province for Gini coefficient.

(DOC)

## Acknowledgments

The authors would like to thank anonymous reviewers for their useful comments and suggestions.

## Author Contributions

Conceived and designed the experiments: YGW. Performed the experiments: XYZ LZ. Analyzed the data: XYZ ZC YGW. Contributed reagents/materials/analysis tools: ZC YGW. Wrote the paper: XYZ LZ.

## References

1. Cao H, Huang S. Principles of Scarce Medical Resource Allocation in Natural Disaster Relief A Simulation Approach. *Medical Decision Making*. 2012; 32(3): 470–476. doi: [10.1177/0272989X12437247](https://doi.org/10.1177/0272989X12437247) PMID: [22367795](https://pubmed.ncbi.nlm.nih.gov/22367795/)
2. Zhang Y, Su H, Shang L, Li D, Wang R, Zhang R, et al. Preferences and Perceived Involvement in Treatment Decision Making among Chinese Patients with Chronic Hepatitis. *Medical Decision Making*. 2011; 31(2): 245–253. doi: [10.1177/0272989X10375990](https://doi.org/10.1177/0272989X10375990) PMID: [20709961](https://pubmed.ncbi.nlm.nih.gov/20709961/)
3. Zere E, Mandhate C, Mbeeli T, Shangula K, Mutirua K, Kapenambili W. Equity in health care in Namibia developing a needs-based resource allocation formula using principal components analysis. *International Journal for Equity in Health*. 2007; 6(1): 1–7.
4. Tao Yi, Henry Kizito, Zou Qinpei, Zhong Xiaoni. Methods for measuring horizontal equity in health resource allocation: a comparative study. *Health Economics Review*. 2014; 4(1): 1–10.
5. World Health Organization. Equity in access to public health. New Delhi, India: Working paper from the 53rd session of the WHO Regional Committee for South-East Asia; 2000. pp. 4–7.
6. Saronga Happiness P, Duysburgh Els, Massawe Sirel, Dalaba Maxwell A, Savadogo Germain, Tonchev Pencho, et al. Efficiency of antenatal care and childbirth services in selected primary health care facilities in rural Tanzania: a cross-sectional study. *BMC Health Services Research*. 2014; 14(3): 96–96.
7. Zhou Z, Gao J, Fox A, Rao K, Ke X, Ling X, et al. Measuring the equity of inpatient utilization in Chinese rural areas. *BMC health services research*. 2011; 11(5): 697–699.
8. Chen M, Chen W, Zhao Y. New evidence on financing equity in China's health care reform-A case study on Gansu province China. *BMC health services research*. 2012; 12(1): 466.
9. Liu S, Griffiths SM. From economic development to public health improvement: China faces equity challenges. *PUBLIC HEALTH*. 2011; 125(10): 669–674. doi: [10.1016/j.puhe.2011.08.004](https://doi.org/10.1016/j.puhe.2011.08.004) PMID: [21907369](https://pubmed.ncbi.nlm.nih.gov/21907369/)
10. Li H, Yu W. Enhancing community system in China's recent health reform: An effort to improve equity in essential health care. *HEALTH POLICY*. 2011; 99(2): 167–173. doi: [10.1016/j.healthpol.2010.08.006](https://doi.org/10.1016/j.healthpol.2010.08.006) PMID: [20800927](https://pubmed.ncbi.nlm.nih.gov/20800927/)



11. Meng Q, Xu L, Zhang YG, Qian JC, Cai M, Xin Y, et al. Trends in access to health services and financial protection in China between 2003 and 2011: a cross-sectional study. *LANCET*. 2012; 379(9818): 805–814. doi: [10.1016/S0140-6736\(12\)60278-5](https://doi.org/10.1016/S0140-6736(12)60278-5) PMID: [22386034](https://pubmed.ncbi.nlm.nih.gov/22386034/)
12. Wagstaff A, Paci P, Van Doorslaer E. On the measurement of inequalities in health. *Social science & medicine*. 1991; 33(5): 545–557.
13. Wagstaff A, Van Doorslaer E, Paci P. On the measurement of horizontal inequity in the delivery of health care. *Journal of Health Economics*. 1991; 10(2): 169–205. PMID: [10113709](https://pubmed.ncbi.nlm.nih.gov/10113709/)
14. Opuni M, Peterman A, Bishai D. Inequality in prime-age adult deaths in a high AIDS mortality setting: does the measure of economic status matter? *Health economics*. 2011; 20(11): 1298–1311. doi: [10.1002/hec.1671](https://doi.org/10.1002/hec.1671) PMID: [20878903](https://pubmed.ncbi.nlm.nih.gov/20878903/)
15. Elwell-Sutton TM, Jiang CQ, Zhang WS, Cheng KK, Lam TH, et al. Inequality and inequity in access to health care and treatment for chronic conditions in China: the Guangzhou Biobank Cohort Study. *Health policy and planning*. 2013; 28(5): 467–479. doi: [10.1093/heapol/czs077](https://doi.org/10.1093/heapol/czs077) PMID: [22987824](https://pubmed.ncbi.nlm.nih.gov/22987824/)
16. Kakwani N, Wagstaff A, Van Doorslaer E. Socioeconomic inequalities in health: measurement, computation, and statistical inference. *Journal of econometrics*. 1997; 77(1): 87–103.
17. Charnes A, Cooper W W, Rhodes E. Measuring the efficiency of decision making units. *European journal of operational research*. 1978; 2(6): 429–444.
18. Jat TR, San Sebastian M. Technical efficiency of public district hospitals in Madhya Pradesh, India: a data envelopment analysis. *Global health action*. 2013; 6(3): 21742–21742.
19. Banker RD, Charnes A, Cooper WW. Some models for estimating technical and scale inefficiencies in data envelopment analysis. *Management science*. 1984; 30(9): 1078–1092.
20. Nuti S, Daraio C, Speroni C, Vainier M. Relationships between technical efficiency and the quality and costs of health care in Italy. *International Journal for Quality in Health Care*. 2011; 23(3): 324–330. doi: [10.1093/intqhc/mzr005](https://doi.org/10.1093/intqhc/mzr005) PMID: [21454349](https://pubmed.ncbi.nlm.nih.gov/21454349/)
21. Kreng V, Yang SW. Efficiency of resource allocation in the hospital sector after global budgeting under National Health Insurance. *Chinese medical journal*. 2013; 126(15): 2900–2906. PMID: [23924465](https://pubmed.ncbi.nlm.nih.gov/23924465/)
22. Poveda AC. Estimating effectiveness of the control of violence and socioeconomic development in Colombia: an application of dynamic data envelopment analysis and data panel approach. *Social indicators research*. 2012; 105(3): 343–366. PMID: [22247581](https://pubmed.ncbi.nlm.nih.gov/22247581/)
23. Cooper WW, Seiford LM, Tone K. *DATA ENVELOPMENT ANALYSIS A Comprehensive Text with Models, Applications, References and DEA-Solver Software*. Second Edition. Springer; 2007.
24. María Caballer-Tarazona, Ismael Moya-Clemente, David Vivas-Consuelo, Isabel Barrachina-Martínez. A model to measure the efficiency of hospital performance. *Mathematical and Computer Modelling*. 2010; 52: 1095–1102.
25. Cattell RB. *The Meaning and Strategic Use of Factor Analysis*. Handbook of Multivariate Experimental Psychology. Springer US; 1988.
26. Kevin FJ, Maccallum RC, Marianne T. The application of exploratory factor analysis in applied psychology: a critical review and analysis. *Personnel Psychology*. 1986; 39(2): 291–314.
27. Shrestha S, Kazama F. Assessment of surface water quality using multivariate statistical techniques: A case study of the Fuji river basin, Japan. *Environmental Modelling & Software*. 2007; 22(4): 464–475.
28. Walsh B, Silles M, O'Neill C. The Role Of Private Medical Insurance In Socio-Economic Inequalities In Cancer Screening Uptake In Ireland. *Health economics*. 2012; 21(10): 1250–1256. doi: [10.1002/hec.1784](https://doi.org/10.1002/hec.1784) PMID: [21905151](https://pubmed.ncbi.nlm.nih.gov/21905151/)
29. Gai RY, Zhou CC, Xu LZ, Zhu M, Wang XZ, Li SX, et al. Health resource allocation and productive efficiency of Chinese county hospitals: Data from 1993 to 2005. *Bioscience trends*. 2010; 4(5): 218. PMID: [21068473](https://pubmed.ncbi.nlm.nih.gov/21068473/)
30. Chu JH, Yu BR, Meng QY. Study on the Equity of Health Service of New Rural Cooperative Medical Scheme in Shandong and Ningxia. *Chinese Health Economics*. 2010; 6: 15.
31. Yande Wang. To improve the hospital cost evaluation index fill caliber discussion. *Journal of Health Economic Research*. 2010;(11: ): 36–38.
32. World Health Organization (WHO). Life expectancy: Life expectancy Data by country. 2014 Jan 1 [cited 10 Feb 2015]. In: World Health Organization (WHO) [Internet]. Geneva Switzerland: WHO 2014. Available: <http://apps.who.int/gho/data/node.main.688>.
